# Supplementary material
Source: MDPI journal article supplement (https://www.mdpi.com/2077-0472/12/9/1416)
Supplement: s1 [file s1]

Table S1: List of primers used for qRT-PCR-based relative quantification of Brassica rapa *EXP* genes

| Primer Name | Primer Name | Sequence (5'→3')       |
|-------------|-------------|------------------------|
| BrEXLB3_F   | EXLB3       | AATCCTCATTATCTTGCCGTCC |
| BrEXLB3_R   | EXLB3       | GGGATTTCGACCCAGTTGAGA  |
| BrEXPA21_F  | EXPA21      | ACAGCCAAGGATACGGTGTG   |
| BrEXPA21_R  | EXPA21      | ACCATCTCGGGTCGTCAGTA   |
| BrEXPA29_F  | EXPA29      | AGAACGACGGGAAATGGTGT   |
| BrEXPA29_R  | EXPA29      | TCGGTAAAGCGTTGTTGGGA   |
| BrEXPA32_F  | EXPA32      | AGCCCATCTACGAGCACATC   |
| BrEXPA32_R  | EXPA32      | ACCGCTTCTCCTGCACCTTA   |
| BrEXPA9_F   | EXPA9       | AGGAACTGGGGGCAGAATTG   |
| BrEXPA9_R   | EXPA9       | TTTGACCGAACCCCCAAGAC   |
| BrEXPA14_F  | EXPA14      | AGGCAGTCCTTCGGTCTTTG   |
| BrEXPA14_R  | EXPA14      | CCTCCGGTAAGAGATGGGGA   |
| BrEXLA2_F   | EXLA2       | AGGCCAAACCGAAGTCGTAG   |
| BrEXLA2_R   | EXLA2       | AGTTGGCCGGAAGAACTCTG   |
| BrEXPA34_F  | EXPA34      | ATAGCCAAGGGTACGGGACA   |
| BrEXPA34_R  | EXPA34      | GAGCCAGGGAGACACCATT    |
| BrEXPA13_F  | EXPA13      | ATGACTCGTAACTGGGGTGC   |
| BrEXPA13_R  | EXPA13      | GTGAACTGGCCTCGAGAAGA   |
| BrEXPA1_F   | EXPA1       | ATTGCAGAAACCAGAGCCGA   |
| BrEXPA1_R   | EXPA1       | CCGTTGTATGCCCCTTCACT   |
| BrEXPA2_F   | EXPA2       | CCAATCCCCGCGACGAAGTA   |
| BrEXPA2_R   | EXPA2       | CGGTGAGGATGATCGAAGTCC  |
| BrEXPA17_F  | EXPA17      | CCATGCCGAAAGAGAGGAGG   |
| BrEXPA17_R  | EXPA17      | CGGCGACGTTTGTGACCAG    |
| BrEXPA23_F  | EXPA23      | CCGCCACGAATCCTAGAGAC   |
| BrEXPA23_R  | EXPA23      | ACCCGTAATTAGGAGCGCAG   |
| BrEXPA35_F  | EXPA35      | CCTCCCAACTTAGCTCAGCC   |
| BrEXPA35_R  | EXPA35      | GCCACCCTGCGGTATGAAA    |
| BrEXPA7_F   | EXPA7       | CCTGAACGGACAAGCACTCT   |
| BrEXPA7_R   | EXPA7       | AAAGGACCAACGAGCGGAAG   |
| BrEXPA5_F   | EXPA5       | CGGTGAAGTACAGGCGAGTT   |
| BrEXPA5_R   | EXPA5       | CGTATCCCAAACCTGTCCCC   |
| BrEXPA6_F   | EXPA6       | CTATTCAACGGCGGCCAAAG   |
| BrEXPA6_R   | EXPA6       | GAGGGTTACACCAACCTCCG   |
| BrEXLA1_F   | EXLA1       | CTTCGTCGTTGTTGTGCTGC   |
| BrEXLA1_R   | EXLA1       | GAGTGGTGAGGACATCGGTC   |

|            |        |                       |
|------------|--------|-----------------------|
| BrEXPA11_F | EXPA11 | GACCAATACGGCGGCTCTTA  |
| BrEXPA11_R | EXPA11 | GAGGATTGCACCATCCACCA  |
| BrEXPA30_F | EXPA30 | GACGGTGGTCACAGCTACAA  |
| BrEXPA30_R | EXPA30 | GGAGGGTTACACCAACCACC  |
| BrEXPA16_F | EXPA16 | GCAACCCACCACAGAAACAC  |
| BrEXPA16_R | EXPA16 | TTTGACACCTCCGGTCTTGG  |
| BrEXPA25_F | EXPA25 | GCATTGGCCTTTGTGGTGTT  |
| BrEXPA25_R | EXPA25 | CGTAAAACGTAGCGTGAGCG  |
| BrEXLB2_F  | EXLB2  | GGAAGCGCCGGTCTCAAT    |
| BrEXLB2_R  | EXLB2  | GAGTTGTAAGTGGCTCCTGCT |
| BrEXPA20_F | EXPA20 | GGTATGAGCTGTGGAGCCTG  |
| BrEXPA20_R | EXPA20 | AAGTGGGCACGTGGAGGAT   |
| BrEXPA8_F  | EXPA8  | GGTCAACGCACATGCAACTT  |
| BrEXPA8_R  | EXPA8  | CTGCAGTGTTGGTCCCGTAT  |
| BrEXPA33_F | EXPA33 | GTGGCTTGCAAAAGGACTGG  |
| BrEXPA33_R | EXPA33 | CCAGCACCACTACGTTCAT   |
| BrEXPA15_F | EXPA15 | GTTACGAGATCATGTGCACGC |
| BrEXPA15_R | EXPA15 | ATCTAACCGGGACAACCCCA  |
| BrEXPA10_F | EXPA10 | GTTGACCACAGTGAACGCTAA |
| BrEXPA10_R | EXPA10 | ACCAGCCTGGATCATTGACA  |
| EXPA4_F    | EXPA4  | TCAACTTTTGCTTCCAGCGG  |
| EXPA4_R    | EXPA4  | ACCTCCCATTGTTCCGGATG  |
| BrEXPA26_F | EXPA26 | TGCATGTCCTAGCGTCTTCA  |
| BrEXPA26_R | EXPA26 | CCTTGGCTGTACAGATTCCCG |
| BrEXPA12_F | EXPA12 | TGGGGAGCTAACTGGCAAAG  |
| BrEXPA12_R | EXPA12 | AGGAACGACGTTGAGAGCTG  |
| EXPA3_F    | EXPA3  | TGGTTGCTGCTCTAACCACA  |
| EXPA3_R    | EXPA3  | AGCACCAAGCTCAAACCAT   |
